# Supplementary material for: Metabolomic response of human skin tissue to low dose ionizing radiation
Source: Royal Society of Chemistry journal article supplement (doi:10.1039/c2mb25061f), 2012-05-08
Supplement: c2mb25061f.pdf [file c2mb25061f.pdf]

## **SUPPLEMENTARY MATERIALS**

### **Metabolomic Response of Human Skin Tissue to Low Dose Ionizing Radiation**

Ze-Ping Hu, Young-Mo Kim, Marianne B. Sowa, R. Joe Robinson, Xiaoli Gao, Thomas O. Metz,

William F. Morgan and Qibin Zhang\*

Biological Sciences Division, Pacific Northwest National Laboratory, Richland, WA, 99352,

USA

I.

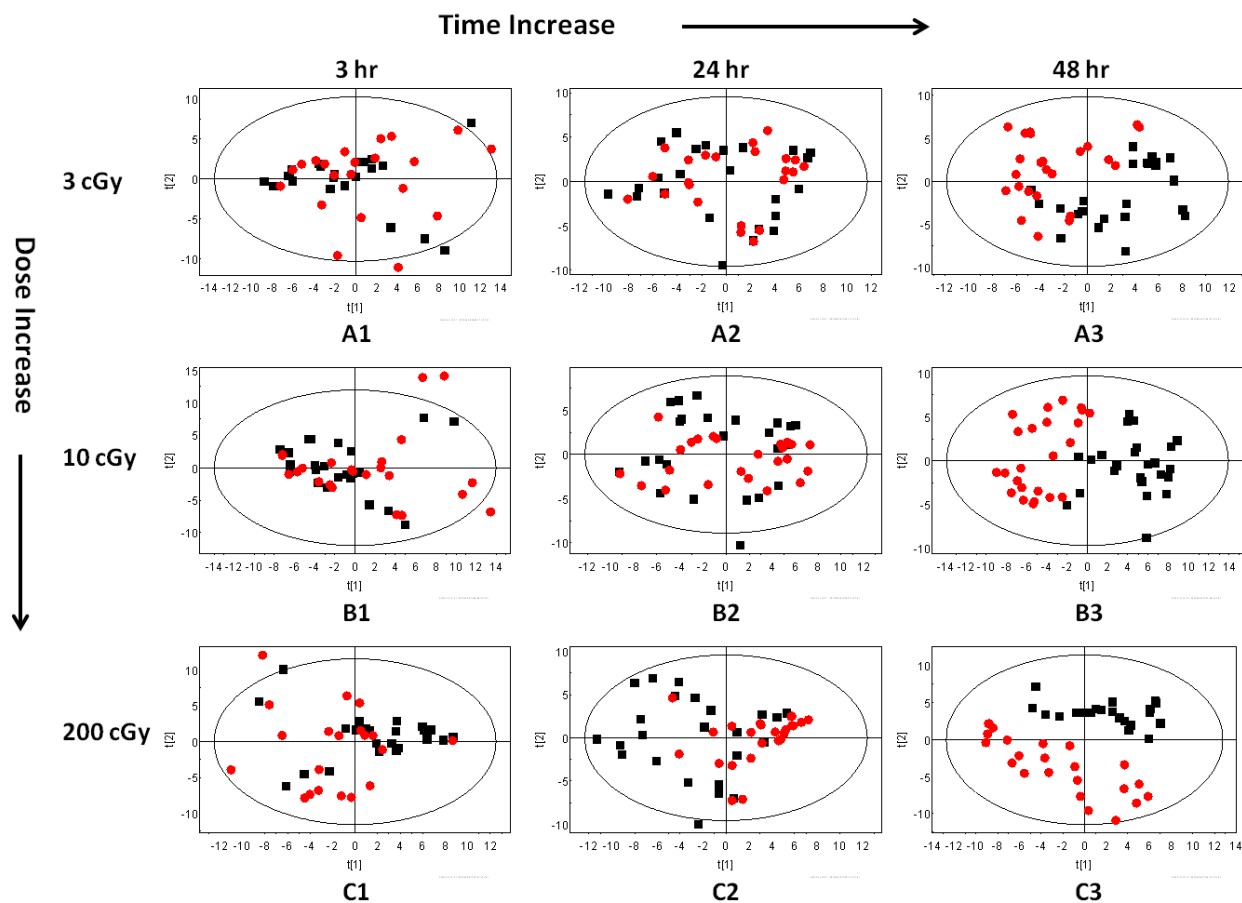

**Figure 1.** PCA scores plots for water-soluble metabolite samples extracted from sham and X-ray irradiated human skin tissues. Each panel shows a different irradiation dose (3, 10 and 200 cGy) at different time point post-irradiation (3, 24 and 48 hr). Each biological sample ( $n = 12$  for each group) was analyzed by GC-MS in duplicate. Outlier samples were removed prior to PCA analysis. The IR-associated metabolic perturbations in human skin manifested at dose- (vertically) and time- (horizontally) dependent manner. Red dot: sham; Black square: irradiated. **A1**, scores plot from sham vs 3 cGy datasets, 3 hr post irradiation (6 components,  $R^2X = 0.69$ ,  $Q^2Y = 0.409$ ); **B1**, scores plot from sham vs 10 cGy datasets, 3 hr post irradiation (6 components,  $R^2X = 0.719$ ,  $Q^2Y = 0.428$ ); **C1**, scores plot from sham vs 200 cGy datasets, 3 hr post irradiation (7 components,  $R^2X = 0.745$ ,  $Q^2Y = 0.393$ ); **A2**, scores plot from sham vs 3 cGy datasets, 24 hr post irradiation (8 components,  $R^2X = 0.566$ ,  $Q^2Y = 0.0558$ ); **B2**, scores plot from sham vs 10 cGy datasets, 24 hr post irradiation (4 components,  $R^2X = 0.378$ ,  $Q^2Y = 0.103$ ); **C2**, scores plot from sham vs 200 cGy datasets, 24 hr post irradiation (7 components,  $R^2X = 0.55$ ,  $Q^2Y = 0.114$ ); **A3**, scores plot from sham vs 3 cGy datasets, 48 hr post irradiation (9 components,  $R^2X = 0.68$ ,  $Q^2Y = 0.226$ ); **B3**, scores plot from sham vs 10 cGy datasets, 48 hr post irradiation (8 components,  $R^2X = 0.689$ ,  $Q^2Y = 0.311$ ); **C3**, scores plot from sham vs 200 cGy datasets, 48 hr post irradiation (8 components,  $R^2X = 0.679$ ,  $Q^2Y = 0.289$ ).

## II.

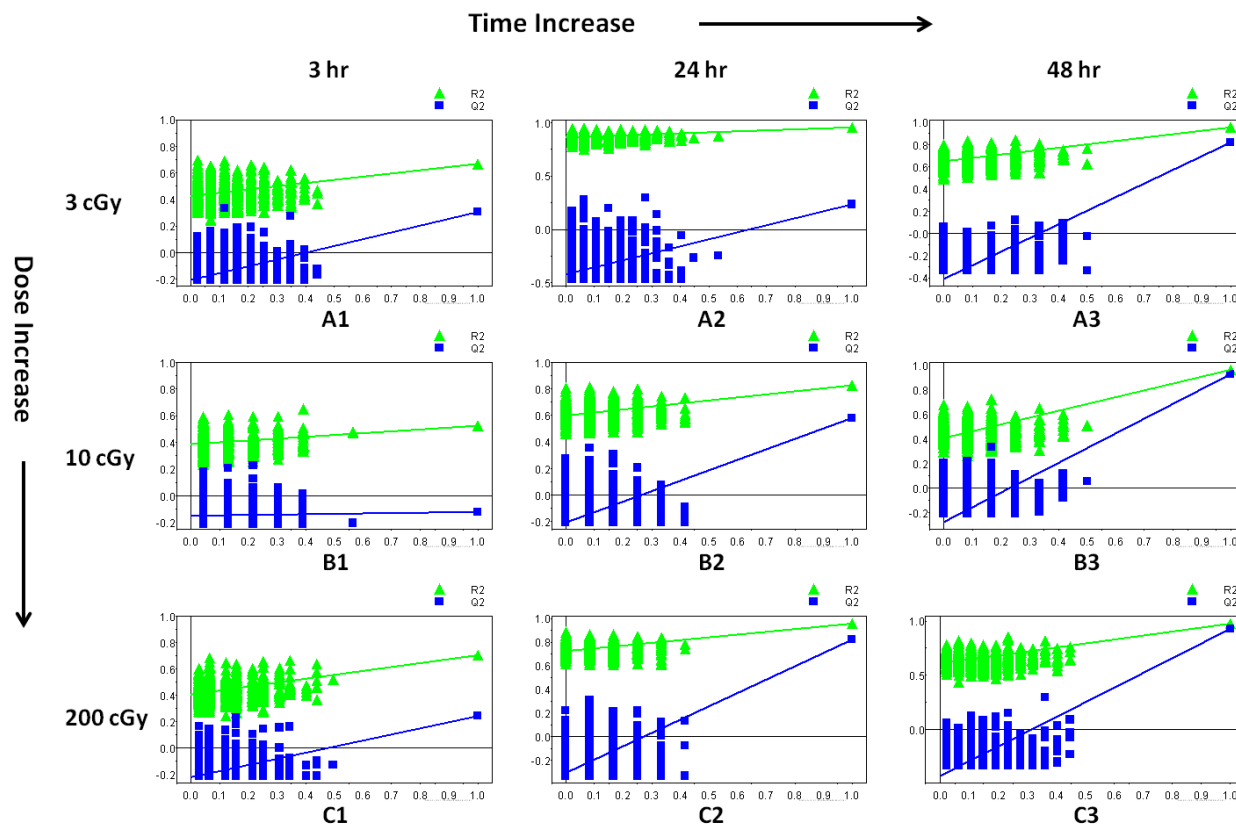

**Figure 2.** Validation results by performing a 999 random permutation test for the PLS-DA models generated from sham and irradiated human skin tissues. Each panel shows a different irradiation dose (3, 10 and 200 cGy) at different time point post-irradiation (3, 24 and 48 hr). Each biological sample ( $n = 12$  for each group) was analyzed by GC-MS in duplicate. Outlier samples were removed prior to PLS-DA analysis. **A1**, permutation test for the PLS-DA model of 3 hr, sham vs 3 cGy datasets, Y-axis intercepts:  $R^2 = (0, 0.425)$ ,  $Q^2 = (0, -0.206)$ ; **B1**, permutation test for the PLS-DA model of 3 hr, sham vs 10 cGy datasets, Y-axis intercepts:  $R^2 = (0, 0.386)$ ,  $Q^2 = (0, -0.148)$ ; **C1**, permutation test for the PLS-DA model of 3 hr, sham vs 200 cGy datasets, Y-axis intercepts:  $R^2 = (0, 0.404)$ ,  $Q^2 = (0, -0.226)$ ; **A2**, permutation test for the PLS-DA model of 24 hr, sham vs 3 cGy datasets, Y-axis intercepts:  $R^2 = (0, 0.864)$ ,  $Q^2 = (0, -0.41)$ ; **B2**, permutation test for the PLS-DA model of 24 hr, sham vs 10 cGy datasets, Y-axis intercepts:  $R^2 = (0, 0.603)$ ,  $Q^2 = (0, -0.211)$ ; **C2**, permutation test for the PLS-DA model of 24 hr, sham vs 200 cGy datasets, Y-axis intercepts:  $R^2 = (0, 0.722)$ ,  $Q^2 = (0, -0.309)$ ; **A3**, permutation test for the PLS-DA model of 48 hr, sham vs 3 cGy datasets, Y-axis intercepts:  $R^2 = (0, 0.644)$ ,  $Q^2 = (0, -0.413)$ ; **B3**, permutation test for the PLS-DA model of 48 hr, sham vs 10 cGy datasets, Y-axis intercepts:  $R^2 = (0, 0.407)$ ,  $Q^2 = (0, -0.28)$ ; **C3**, permutation test for the PLS-DA model of 48 hr, sham vs 200 cGy datasets, Y-axis intercepts:  $R^2 = (0, 0.612)$ ,  $Q^2 = (0, -0.422)$ .
